# Supplementary material for: Biochar alters hydraulic conductivity and inhibits nutrient leaching in two agricultural soils
Source: Copernicus journal article supplement (doi:10.5194/soil-2021-45), 2021-05-27
Supplement: Supplementary file [file soil-2021-45-AC1-supplement.pdf]

1 **Reviewer #1**

2 **The authors contribute with their study to an ongoing and substantial discussion of the effect of**  
3 **biochar on the hydraulic properties of soils and the potential of biochar to bind and retain nitrate and**  
4 **ammonium in soils. While this is an important discussion for the application of biochar in agricultural**  
5 **soils, the submitted manuscript is not well structured and, much more importantly, it is not clearly**  
6 **providing a novel approach or understanding for the ongoing scientific discussion. Furthermore, the**  
7 **manuscript is not transparent to follow the methodological approach. It is not clear why the column**  
8 **retention experiment was only performed for the HSL and the described effect of additional nitrate**  
9 **leaching with biochar is not supported by shown data. The fairly short discussion is by far not**  
10 **complete. Many aspects contradicting the here reported findings are not considered (please see**  
11 **specific comments). This results also in a lack of new mechanistic understanding and the link to the**  
12 **agricultural soils. For example, the authors are not considering the effect of the two agricultural soils**  
13 **on the nutrient mobility or bring their findings in context of potential field applications. I highly**  
14 **recommend the authors to consider a critical discussion of their findings, developing supported**  
15 **mechanistic understanding from these experiments, improve the transparency of the experimental**  
16 **approach and improve the overall manuscript structure. Given these aspects, I decided to reject the**  
17 **current manuscript for publication in SOIL.**

18  
19 Response: We greatly appreciate the time and effort that went into this extensive and constructive  
20 review. We will address the reviewers concerns by restructuring the manuscript, providing more  
21 comprehensive information in the materials and methods section, making linkages between these  
22 experiments and our corresponding field trials clearer, and highlighting the novelty of this work through  
23 a more nuanced, critical, and lengthy discussion section, as detailed below. Furthermore, we have  
24 performed an additional experiment to answer the reviewer's questions about the effect of pH and the  
25 mechanistic underpinnings behind observed results. The point of zero charge (PZC) for each biochar is  
26 now included, as described below.

27  
28 **Specific comments:**

29  
30 **Abstract and introduction:**

- 31  
32 • **Line 9-10: specify “saturated hydraulic conductivity (Ksat)”**

33  
34 Response: We corrected this in the manuscript.

- 35  
36 • **Line 44-46: Provide reference for this statement**

37  
38 Response: We have included a reference to Clough and Condron (2010) and Peiris et al. (2018), as  
39 cited in the bibliography at the end of this response.

- 40  
41 • **Line 65: What is the mechanism for the high values found in Yin et al (2018). Please provide more**  
42 **details**

43  
44 Response: The mechanism cited in Yin et al. (2018) is the “abundant surface functional groups” that  
45 develop at low pyrolysis temperatures. Following our statement on lines 66-74, there is a well-cited  
46 review of mechanisms which details the relationship between pyrolysis temperature and biochar  
47 characteristics. To make the relationship between this statement and the Yin paper more clear, we

48 made two corrections. On line 69, we added Yin et al. (2018) to the discussion of studies which find  
49 higher adsorption values at lower temperatures, to state:

50  
51 “Lower temperatures have been correlated with higher cation exchange capacity (CEC) (Gai et  
52 al., 2014a), higher O/C ratios (Yang et al., 2017), and more abundant surface functional groups  
53 (Yin et al., 2018).”

54  
55 We have also revised the original statement to exclude specific adsorption values, as follows:

56  
57 “While most reported  $Q_{\max}$  values are less than 20 mg  $\text{NH}_4^+\text{-N g}^{-1}$  (Zhang et al., 2020), higher  
58 values have been observed (Yin et al., 2018, Gao et al., 2015).”

59  
60 This allows for discussion of the range and inconsistencies found within the literature, without  
61 overburdening the reader with specific values and mechanisms for each of the 15 cited papers,  
62 immediately prior to a 9-line discussion and summary of mechanisms. Furthermore, this revised  
63 sentence matches the format provided for the discussion of nitrate sorption on line 55.

- 64  
65 • **Line 96-102: Too detailed method description for an introduction. Please shorten to avoid**  
66 **repetition.**

67  
68 Response: We have removed 7 lines, to develop the paragraph below:

69  
70 “In this project, biochar characterization, sorption, and soil column experiments were carried  
71 out using biochars of diverse feedstocks and production temperatures, in order to determine to  
72 what degree these biochars: 1) chemically bind nitrate and ammonium; 2) physically alter the  
73 soil to influence saturated hydraulic conductivity; or 3) influence nutrient leaching, through  
74 either chemical or physical means. This information was used to determine the parameters that  
75 may optimize hydrologic and nutrient retention benefits in two agricultural soils, and to  
76 investigate the combination of chemical and physical mechanisms by which these benefits are  
77 delivered. Our results are expected to inform the process of biochar production or modification  
78 for the above-mentioned specific purposes, as well as improve predictions on biochar behaviour  
79 in specific agricultural conditions.

80  
81 **Material and Methods:**

- 82 • **Line 106-108: What are the production durations of the selected chars**

83  
84 Response: As the biochars are commercially available, many of the production details are  
85 proprietary and were not disclosed. However, we can amend the paragraph to state the individual  
86 producers, as below. This would allow for other scientists to repeat experiments with these  
87 biochars, and to contact the companies for more information if desired. It also emphasizes that  
88 individual production details were beyond the control of the authors.

89  
90 “Seven biochars were obtained from the following feedstocks and produced at the following  
91 temperatures: almond shell at 500 °C (AS500, produced by Karr Group Co.), almond shell and  
92 800 °C (AS800, Premier Mushroom and Community Power Co), coconut shell at 650 °C (CS650,  
93 Cool Planet), softwood at 500 °C (SW500, Karr Group Co.), softwood at 650 °C (SW650, Cool  
94 Planet), and softwood at 800 °C (SW800, Pacific Biochar), and an additional softwood biochar

95 produced at 500 °C and inoculated with a proprietary microbial formula (SW500-I, Karr Group  
96 Co.).”

97

- 98 • **Line 107-108: Please provide details on the char with inoculated microbial formula**

99

100 Response: As stated above, the microbial formula is proprietary and was not disclosed to authors.  
101 That fact has now been made clear in the above text. Additionally, as this product is commercially  
102 available, the experiment can be reproduced by other researchers by purchasing this material.

103

- 104 • **Line 113: What is the duration of the individual temperature steps?**

105

106 The sentence has now been revised to contain the requested information as well as the reference  
107 for this method, as below:

108

109 “...and moisture, volatile, and ash content were measured as a percent of total dry weight  
110 through sequential shifts in furnace temperature (briefly, 2 h at 105 °C, 6 m at 950 °C, and 6 h at  
111 750 °C, respectively) (ASTM D 1762-84, 2011).”

112

- 113 • **Line: 122: The authors can avoid to mention a private company because they followed the**  
114 **standardized protocol/ Line 123: Provide ISO number here**

115

116 Response: The company name has been removed, and the ISO number has been included, as  
117 follows:

118

119 “Specific surface area was determined from CO<sub>2</sub> adsorption isotherms according to the  
120 Brunauer, Emmet, Teller (BET) method ISO 9277:2010 (International Organization for  
121 Standardization (ISO), 2010).”

122

- 123 • **Line 124-128: Not clear if the authors used finally the DRIFT or FTIR. Please clarify.**

124

125 Response: DRIFT (diffuse reflectance infrared Fourier transform) is a specific sampling method of  
126 FTIR (Fourier transform infrared) spectroscopy; DRIFT was used as the FTIR sampling method. We  
127 have edited the FTIR method to be explicitly clear. The text now reads:

128

129 “Fourier transform infrared (FTIR) spectra of AS500, AS800, and SW500 biochars were collected  
130 using the diffuse reflectance infrared Fourier transform (DRIFT; PIKE Technologies EasiDiff)  
131 sampling mode with air dried samples diluted to 3% with potassium bromide.”

132

- 133 • **Line: 137-138: Not clear to what field trials they authors are referring here. Were the soils taken**  
134 **from long-term field trials locations?**

135

136 Response: We believe the below paragraph makes clear that the soils were taken from field trials.  
137 However, we have modified the sentence (added details in bold) to provide more detail:

138

139 “Hanford sandy loam (HSL) and Yolo silt loam (YSiL) soils were chosen for continuity between  
140 laboratory experiments and ongoing **3-year field trials utilizing the same biochars and soils.**  
141 Collectively, these soils represent over 260,000 hectares of arable land in California and offer  
142 textural distinctions within a range of soils commonly farmed in the Central Valley of California

143 (Soil Survey Staff, 2014). Soils were located via Web Soil Survey  
144 (<http://websoilsurvey.sc.egov.usda.gov/>) and collected from the top 30 cm in fallowed  
145 agricultural fields in Parlier, California (HSL) and Davis, California (YSiL).”  
146

147 • **Line 147: What was the core volume?**

148  
149 Response: This information has been added to line 176 in Methods section 2.4 *Column experiments*,  
150 as follows below (in bold):  
151

152 “To investigate the influence of biochar on saturated hydraulic conductivity ( $K_{sat}$ ), constant head  
153 column experiments were performed in five replicates using the 5 station Chameleon Kit  
154 (Soilmoisture Equipment Corporation (SEC) 2816GX). SEC tempe cells, **each with a volume of**  
155 **136.4 cm<sup>3</sup>** were packed with soils amended with 0 and 2% (w/w) AS500, AS800, or SW500  
156 biochars...”  
157

158 • **Line 165: The authors should include more information about the tested models in the**  
159 **supplement. Which fitting parameter were considered to evaluate the goodness of fit and avoid**  
160 **over parameterization (e.g. AICc)**

161  
162 Response: Our simple linear models did not have random effects or interactions, and are therefore  
163 not at danger of being overfit. We have made our statistical approach clearer by rephrasing (new  
164 content in bold):  
165

166 “**All data were analysed with linear models (lm(response variable ~ biochar))** and one-way  
167 analysis of variance (ANOVA) in the stats and Tidyverse packages in R (R Core Team, 2020;  
168 Wickham et al., 2019). **When more than one soil type was tested (as in  $K_{sat}$  measurements),**  
169 **separate models were built for each soil type to determine the effect of biochar within soil**  
170 **types.** For analysis of results, all effects with p-values < 0.05 were considered significant. P-  
171 values were generated using the emmeans package in R (Lenth, 2019) and corrected for  
172 multiple comparisons using Tukey’s honestly significant difference (HSD) method. Plots were  
173 generated in R using the ggplot2 package (Wickham, 2016) and visualized as the mean plus or  
174 minus the standard error of the means.”  
175

176 • **Line 176-177: Was the soil and biochar homogeneous mixed? How was this ensured?**

177  
178 Response: Yes, soils and biochars were thoroughly and homogenously mixed through a combination  
179 of stirring and shaking within a sealed container for a minimum of 120 seconds. The following  
180 sentence has been added to line 178:  
181

182 “Soils and biochars were thoroughly and homogenously mixed prior to being added to tempe  
183 cells.”  
184

185 • **Line 177: What would be the typical application rate on the agricultural soils used in this study?**

186  
187 Response: The biochar community has yet to reach consensus on recommended application rates,  
188 and therefore there is no typical or standard rate used in agricultural soils. One meta-analysis  
189 concluded that the greatest agronomic benefits were observed in studies utilizing 100 t ha<sup>-1</sup> (Jeffery  
190 et al., 2011). More recently, Oladele (2019) developed a soil quality index using data from a three-

191 year field trial, which concluded that a biochar application rate of 6-12 t ha<sup>-1</sup> was optimal, though  
192 results were constrained to acidic alfisols (USDA Soil Taxonomy) (Oladele, 2019). Pandit et al. (2018)  
193 conducted an economic analysis which included payments for C sequestration, to determine an  
194 optimal rate of 15 t ha<sup>-1</sup> (Pandit et al., 2018). Guo (2020) made even more specific recommendations  
195 based on the results of a literature review and from greenhouse trials, concluding that biochar  
196 should be applied at a concentration of 2–5% by weight for wood- and crop residue-derived  
197 biochars, and 1–3% for manure-derived biochars (Guo, 2020). Our rate of 2% falls within the  
198 recommendations contained within Guo (2020) and Jeffery (2011). If incorporated to a depth of 12  
199 inches, assuming a bulk density of 1.33 g cm<sup>-3</sup>, this is an application rate of 81.2 t ha<sup>-1</sup>. This rate was  
200 chosen as the result of the studies herein mentioned, and as described in the text, is “the midrange  
201 of those represented in similar experiments (Blanco-Canqui, 2017).” The paper cited here is a  
202 literature review that contains data from 28 experiments on biochar’s effect on K<sub>sat</sub>.  
203

- 204 • **Line 181: Why did the authors not include both soils here? Please provide a clear argument since**  
205 **this is substantial for the whole discussion of the manuscript.**

206  
207 We agree that the study would have benefited from leaching data from both the YSiL and the HSL  
208 soils. However, column experiments were performed without the aid of autosamplers or  
209 mechanization of any kind. As shown in Figure 3, the K<sub>sat</sub> for the unamended HSL soil columns was  
210 1.2 cm s<sup>-1</sup>. To manually collect 20 pore volumes of leachate, 15 hours of active maintenance was  
211 required per treatment, for a total of 4 treatments. The YSiL K<sub>sat</sub> was 0.044 cm s<sup>-1</sup>, or a 96%  
212 reduction in flow rate from the HSL. Therefore, we considered it unfeasible for someone to stay in  
213 lab for the time required to collect 20 pore volumes at this speed. After attempting it for two  
214 treatments, we decided to proceed with the HSL data, as it was logistically possible and would  
215 provide more valuable information. To make this clear to readers, we will include the following  
216 statement (new content in bold):  
217

218 “Columns were also used to investigate the nutrient retention and leaching in HSL  
219 amended with 0 and 2% biochar. Preliminary trials with the YSiL demonstrated that leaching  
220 rates were very low (~0.044 cm<sup>-1</sup>) creating logistical challenges for conducting these  
221 experiments. Additionally, the impact of nitrate leaching is much more pronounced in more  
222 coarsely textured soils and thus leaching experiments were conducted only in HSL columns”  
223

- 224 • **Results: Large parts of the result section describes the biochar and soil. The author should**  
225 **consider to include the characterizations in the material and method section. The result section**  
226 **should focus on the actual findings regarding the sorption and Ksat effect of the biochar on the**  
227 **soils.**

228  
229 Response: As one of our objectives was to “determine the soil and biochar parameters which may  
230 optimize hydrologic and nutrient retention benefits in two agricultural soils,” we do not agree that  
231 this information is extraneous or takes away from the results that follow. This is especially true given  
232 how important IR and microCT data was for interpreting those results. However, we have shortened  
233 this section by moving *Table 2: Functional group assignments corresponding to organic biomass* to  
234 supplementary information.  
235

- 236 • **Line 196: Please specify “carbon, hydrogen contents and leachable DOC”**  
237

238 Response: We are not sure why this is different than the phrase already included (“decreased  
239 carbon, hydrogen, and DOC”) as the word “contents” is implied when discussing biochar  
240 constituents, and “leachable” is both implied from the OC having been dissolved (D), and explicit  
241 from the description of DOC methodology.  
242

- 243 • **Line 196-197: Please avoid interpretation of the data and comparison to the litterateur in the**  
244 **result section. This is part of the discussion.**

245  
246 Response: We have addressed this in the manuscript by moving any interpretation and comparison  
247 to the literature to the discussion section. This will further shorten the biochar characterization  
248 results by two lines.  
249

- 250 • **Line 203-204: This aspect should be considered in the discussion and clearly mentioned in the**  
251 **material and methods. The oxidation state of the biochar will also influence the surface reactivity,**  
252 **which may, in fact, explain the here observed findings.**

253  
254 Response: We agree that the oxygen content (interpreted from “oxidation state” in reviewer  
255 content) of the biochar will influence surface reactivity and explain results. As such, we covered this  
256 extensively in the discussion section beginning on line 317:  
257

258 While it is typical for biochars produced at high temperatures to have low O/C ratios and low  
259 CEC (Hassan et al., 2020), AS800 had the largest O/C ratio at 0.56 (presumably due to post-  
260 pyrolysis oxidation), and the second highest CEC at 52.75 cmolc kg<sup>-1</sup>. These properties, as well as  
261 the IR band at 1405 cm<sup>-1</sup> (COO<sup>-</sup>), likely explain the high ammonium retention, as they indicate  
262 increased exchange sites and oxygen-containing functional groups which can react with  
263 ammonium. The relationship between these biochar properties and ammonium binding capacity  
264 was also demonstrated with SW800, which had the highest CEC at 60.83 cmolc kg<sup>-1</sup>, the second  
265 highest O/C ratio at 0.27, and the second highest ammonium binding capacity. These  
266 observations are consistent with those of other studies (Gai et al., 2014; Yang et al., 2017).  
267

268 As the specific details of biochar production methodology were proprietary, this is not a “method”  
269 but a hypothesis to explain an observed result. As such, it cannot be included in the methods  
270 section. However, we have made this more clear by removing the line about post-pyrolysis oxidation  
271 from the results section and including it strictly in the discussion section.  
272

- 273 • **Line 211: include “1410 and 1418 cm<sup>-1</sup>”**

274  
275 Response: We will correct this by adding “cm<sup>-1</sup>” in the manuscript, and thank the reviewer for this  
276 attention to detail.  
277

- 278 • **Line 213-215: As mentioned above these differences in biochar production should be clearly**  
279 **presented in the material and method section and also critically discussed in the discussion**

280  
281 Response: We agree, and will move this section into the materials and methods.  
282

- 283 • **Line 237: Soil texture expressed as mass per mass (g/g) is a content and not a concentration.**  
284 **Furthermore, avoid digits for these values.**

285

286 We agree that percent soil texture should be reported as content and have made this change.

287

- 288 • **Table 3: Correct the number of digits for texture. Also, pH is commonly measured with on digit**
- 289 **precision.**

290

291 Response: We have made these changes as recommended.

292

- 293 • **Section 3.3: Provide the data for the nitrate leaching. What is the order of magnitude if the nitrate**
- 294 **release? This data needs to be shown.**

295 Response: This data has been added to the supplementary information document.

- 296 • **Figure 2: Please show the fitted isotherms**

297

298 Response: We initially visualized Freundlich and Langmuir models for each biochar in figure 2.  
299 However, due to the high number of biochars included in this study, the figure became cluttered  
300 and difficult to read. While we acknowledge that fitted isotherms are one appropriate way to display  
301 sorption data, there is a rich literature base which shows  $C_e$  vs  $Q_e$ , or % adsorbed vs quantity in  
302 solution, without model fits, but rather provides  $R^2$  values for models instead (Gai et al., 2014; Wang  
303 et al., 2015; Yao et al., 2012, to name just a few). Due to the relatively low  $R^2$  values we discuss, we  
304 believe simply visualizing  $C_e$  vs  $Q_e$  for each rep of each treatment is a more descriptive and  
305 quantitative way of viewing this data, with model  $R^2$  values in a table provided directly following the  
306 figure.

307

- 308 • **Line 268-369: Please specify this statement and clearly indicate to which the p values correspond**
- 309 **to.**

310

311 Response: We have edited the statement as follows:

312

313 "There was a main effect of biochar ( $p = 0.001$ ) and soil texture ( $p < 0.001$ ), as well as a  
314 significant interaction between biochar and soil texture ( $p = 0.006$ ), on saturated hydraulic  
315 conductivity."

316

- 317 • **Line: 285: "HSL at pore volume 14.3" corresponds this to the controls?**

318

319 Response: We have edited the statement to say: "HSL (control) at pore volume 14.3"

320

- 321 • **Discussion: This discussion is not complete and is not discussion available contradicting literature.**
- 322 **A few suggestions can be found below. However, I recommend an extensive literature review to**
- 323 **develop a structured and complete discussion.**

324

325 We agree that the manuscript could be improved by a lengthier, more nuanced, and more detailed  
326 discussion, and thank the reviewer for this suggestion. However, we believe that this manuscript  
327 already includes an extensive literature review, covering most of the articles the reviewer  
328 suggested. We do not believe we need *more* literature, but, as the reviewer stated, a *better*  
329 *structured* literature review. Currently, we have included a lengthy discussion of the contradictory  
330 literature in the introduction. We did not include these same references in the discussion so as to

331 avoid repetition, but agree that this context is important for our specific results. In the revised  
332 version, we have moved some of the extensive discussion from the introduction into the discussion,  
333 and relate all findings to our results, as described extensively throughout this document.  
334

- 335 • **Line 315: It is mentioned already that this char might be oxidized, the authors should clearly**  
336 **indicate this in the sections before. This initial "bias" effect needs more critical discussion here.**

337  
338 Response: We have revised the information about potential post-pyrolysis oxidation as described in  
339 this document on page 5, regarding the comment about line 21.

- 340  
341 • **The hole paragraph provides no mechanist discussion. It is just comparing the findings with the**  
342 **literature. Please improve the discussion here and connect the different sportive capacities with**  
343 **the properties of of the chars.**

344  
345 Response: We respectfully disagree that this paragraph does not include mechanistic discussion, as  
346 we clearly delineate the relationship between biochar properties (high O/C, CEC, and oxygen-  
347 containing function groups) and their demonstrated ability to retain positively charged ammonium  
348 ions, as copy/pasted below:

349  
350 “AS800 had the largest O/C ratio at 0.56 (presumably due to post-pyrolysis oxidation), and the  
351 second highest CEC at 52.75 cmolc kg<sup>-1</sup>. These properties, as well as the IR band at 1405 cm<sup>-1</sup>  
352 (COO<sup>-</sup>), likely explain the high ammonium retention, as they indicate increased exchange sites  
353 and oxygen-containing functional groups which can react with ammonium. The relationship  
354 between these biochar properties and ammonium binding capacity was also demonstrated with  
355 SW800, which had the highest CEC at 60.83 cmolc kg<sup>-1</sup>, the second highest O/C ratio at 0.27, and  
356 the second highest ammonium binding capacity. These observations are consistent with those  
357 of other studies (Gai et al., 2014; Yang et al., 2017). No clear trends between surface area and  
358 ammonium retention emerged in this study.”

- 359  
360 • **Line 318-320: Figure 2 shows actually no clear differences between SW800 and the other chars. What**  
361 **is the explanation? In fact, only AS800 shows the previous mentioned large binding capacities of**  
362 **ammonium.**

363  
364 Response: Figure 2 visibly demonstrates that SW800 has a higher binding capacity than all biochars  
365 (except AS800) at initial ammonium concentrations of 50, 100, and 200 mg L<sup>-1</sup>. The reviewer is correct in  
366 their statement that this effect is less clear at the higher concentrations of 400 and 600 mg L<sup>-1</sup>.  
367 Furthermore, authors of this manuscript never claimed any biochar to have a large binding capacity, but  
368 rather stated: “all biochars exhibited the capacity to remove ammonium from solution (Fig. 2), though K<sub>f</sub>  
369 values were low (Table 4)” and “The ability of all seven biochars to retain ammonium, and within the  
370 demonstrated ranges, is consistent with other published studies (Zhang et al., 2020). AS800 exhibited  
371 substantially higher ammonium binding capacity than the other biochars tested.” These statements are  
372 in agreement with those the reviewer made in this comment.

- 373  
374 • **Line 324-329: The whole paragraph misses to bring the findings of this study in context of studies with**  
375 **contradicting results which is actually in some of the already cited papers. But there is certainly more**  
376 **literature on this effects and higher nitrate binding capacities are reported. Only Zhang et al (2020) is**  
377 **cited here to support the findings of this study, which is by far not complete. Here are a few**  
378 **suggestions also providing contradictory findings (and literature within):**



- 379 • Kameyama, K., Miyamoto, T., Iwata, Y., and Shiono, T.: Influences of feedstock and pyrolysis  
 380 temperature on the nitrate adsorption of biochar, *Soil Science and Plant Nutrition*, 62, 180–184,  
 381 <https://doi.org/10.1080/00380768.2015.1136553>, 2016.
- 382 • Cao, H., Ning, L., Xun, M., Feng, F., Li, P., Yue, S., Song, J., Zhang, W., and Yang, H.: Biochar can  
 383 increase nitrogen use efficiency of *Malus hupehensis* by modulating nitrate reduction of soil and  
 384 root, *Applied Soil Ecology*, 135, 25–32, <https://doi.org/10.1016/j.apsoil.2018.11.002>, 2019.
- 385 • Yang, J., Li, H., Zhang, D., Wu, M., and Pan, B.: Limited role of biochars in nitrogen fixation through  
 386 nitrate adsorption, *Science of The Total Environment*, 592, 758–765,  
 387 <https://doi.org/10.1016/j.scitotenv.2016.10.182>, 2017.
- 388 • Aghoghovwia, M. P., Hardie, A. G., and Rozanov, A. B.: Characterisation, adsorption and desorption  
 389 of ammonium and nitrate of biochar derived from different feedstocks, *Environmental Technology*,  
 390 1–14, <https://doi.org/10.1080/09593330.2020.1804466>, 2020.
- 391 • Hagemann, N., Kammann, C. I., Schmidt, H.-P., Kappler, A., and Behrens, S.: Nitrate capture and slow  
 392 release in biochar amended compost and soil, *PLoS ONE*, 12, e0171214,  
 393 <https://doi.org/10.1371/journal.pone.0171214>, 2017.

394  
 395 Response: We agree that there are many studies which report results contradictory to our own, and as  
 396 the reviewer mentioned, many were cited in this paper. Zhang et al (2020) was cited as the only source  
 397 for the statement on line 324 because, as explicitly stated, this study is a literature review which  
 398 calculated mean nitrate sorption for a range of biochars across the literature. However, we have revised  
 399 this statement to include more of the sources already cited, as well as those the reviewer has offered, to  
 400 make our knowledge of the literature base more explicit. Furthermore, our introduction section  
 401 currently includes 11 sources to support the discussion of contradictory nitrate sorption. To present a  
 402 clearer argument and provide a better manuscript structure, we will reorganize the material aiming for a  
 403 shorter introduction and a lengthier discussion section, in which each of our results are directly linked  
 404 with the studies that found similar or contradictory sorption.

- 405  
 406• **Section 4.2: Similar to the paragraph before, this section misses a critical discussion of the findings.**  
 407 **The authors need to include a more mechanistic explanation of the ammonium and nitrate retention**  
 408 **in soils. Actually, the soil effect (e.g. texture and pH) is not included at all. All these observations are**  
 409 **also based on the experiment of the HSL. This need to be critically discussed. The effect may change**  
 410 **drastically with different soils. Please follow also here the above mentioned literature, which is only a**  
 411 **short list of literature on this topic.**

412  
 413 Response: As stated in the previous response, we have reorganized the manuscript to include the  
 414 extensive discussion that is currently in place on lines 45–74 of the introduction section, in the discussion  
 415 section instead. This discussion includes detailed descriptions of mechanisms from contradictory results  
 416 in the literature:

417  
 418 “Due to the deprotonation of surface functional groups at agronomic soil pHs, biochar is typically  
 419 negatively charged..... Electrostatic repulsion between nitrate and biochar has indeed been regularly  
 420 cited as the reason behind little to no nitrate removal in batch sorption experiments... Higher  $Q_{\max}$   
 421 values for biochar and ammonium are to be expected, as ammonium exists in the cationic form in  
 422 aqueous environments and would more readily adsorb to negatively charged biochar surfaces.....  
 423 Multiple authors have observed that sorption capacity decreases with increasing production  
 424 temperature (Gai et al., 2014; Gao et al., 2015; Yin et al., 2018). Lower temperatures have been  
 425 correlated with higher cation exchange capacity (CEC) (Gai et al., 2014), and higher O/C ratios (Yang

426 et al., 2017). These properties may contribute to biochars with the ability to remove ammonium  
427 from solution, as they provide a greater number of exchange sites and oxygen-containing functional  
428 groups which can react with ammonium (Yang et al., 2017). The reverse trend has also been  
429 observed, however, with authors noting that an increase in production temperature resulted in  
430 higher ammonium  $Q_{max}$  values (Chandra et al., 2020; Zeng et al., 2013; Zheng et al., 2013). These  
431 authors point towards the higher specific surface area (SA) of biochar at higher production  
432 temperatures as a critical parameter to predicting ammonium adsorption.”  
433

434 To further address the effect of soils not tested in this experiment, we have included a critical discussion  
435 of the impact of soil texture as demonstrated in other experiments, and explicitly state that our results  
436 are constrained to a sandy loam, and may not be observed in other contexts. To address the pH effect of  
437 various soils, we have conducted one additional experiment to learn the point of zero charge (PZC) of  
438 the three biochars in question. We have included this data, as well as the appropriate methods  
439 description and citation of sources. Briefly, we found that the PZC was 6.8 for AS800, 3.2 for AS500, and  
440 3.9 for SW500. As most agricultural soils have a pH well above 4, the behavior of AS500 and SW500 are  
441 not likely to change as the result of agricultural soil pH, as thereactive functional groups on soil organic  
442 matter and minerals will remain deprotonated and able to bind to ammonium more strongly than  
443 nitrate. The higher PZC of AS800 was to be expected, as it has a higher ash content, and higher metal-  
444 oxide content as demonstrated through IR peaks at  $\sim 1000$  to  $700\text{ cm}^{-1}$ , consistent with metal oxide  
445 vibrations (Parikh et al., 2014). That the pH of AS800 is closer to the soil pH of those tested in this study  
446 (7.3), however, indicates that AS800 may be strongly effected by soil pH, and able to bind even more  
447 ammonium at lower pHs. We will expand our mechanistic discussion to include this information and  
448 citation of the effect of soil pH on the electrostatic affinity between biochar and nitrate and ammonium.  
449

450● **The authors also miss to bring their findings in context of the applicability under field conditions and  
451 unsaturated soil conditions.**

452  
453 Response: We agree that the link between this study and our ongoing field trials was not made clear  
454 enough, as description of the field trials is currently contained only in the methods section 2.2. In the  
455 next iteration of this manuscript, we have included an additional final paragraph in the discussion  
456 section, as detailed below:

457  
458 4.4 Implications for field conditions  
459

460 The results of this study suggest these biochars may increase the residence time of water in  
461 sandy soils and increase drainage in fine textured soils during irrigation or flooding events, or  
462 when soils are otherwise saturated. Results may be particularly relevant for flooded agricultural  
463 systems such as rice, where ammonium is the primary source of N and water retention is a key  
464 parameter for success (Minami, 1995). Indeed, 95% of California rice production occurs in the  
465 Sacramento Valley, where both the YSiL and HSL soils are common  
466 ([http://rice.ucanr.edu/About\\_California\\_Rice/](http://rice.ucanr.edu/About_California_Rice/)). Data from these trials may help growers in  
467 these regions and soil textures determine if biochar can increase water and nutrient retention in  
468 their systems.  
469

470 Recent meta-analyses have concluded that biochar substantially increased soil water content at  
471 field capacity and permanent wilting point, in the field and lab, in coarse textured soils only  
472 (Blanco-Canqui, 2017; Razzaghi et al., 2020). Despite these observed trends, benefits have also  
473 been observed in fine textured soils, including reduced crop water stress, increased yield (Kerré

474 et al., 2017; Nawaz et al., 2019), and reduced crop loss during deficit irrigation (Madari et al.,  
475 2017). Other authors have reported little to no effect, or transient effects, of biochar on soil  
476 water dynamics in both fine and coarse textured soils (Jones et al., 2012; McDonald et al., 2019;  
477 Nelissen et al., 2015). However, results from our experiments cannot be extrapolated to dryland  
478 agriculture or in soils that experience wet-dry cycles, as unsaturated hydraulic conductivity was  
479 not measured. In order to determine how these biochars may behave in unsaturated conditions,  
480 three-year processing tomato field trials are currently underway in these same soil textures, in  
481 which soil-water dynamics are being measured.

482

483• **Section 4.3: This section also misses some aspects which need to be discussed in this context. Only  
484 one application rate of biochar was used, it is not discussed if this rate is representative for these soils  
485 and its agricultural use. Furthermore, it is known that also the application rate and particle size has an  
486 effect on the  $K_{sat}$  depending in the soil texture as discussed in the below listed literature.**

- 487 • *Obia, A., Mulder, J., Hale, S. E., Nurida, N. L., and Cornelissen, G.: The potential of biochar in  
488 improving drainage, aeration and maize yields in heavy clay soils, PLoS ONE, 13, e0196794,  
489 <https://doi.org/10.1371/journal.pone.0196794>, 2018.*
- 490 • *Herath, H. M. S. K., Camps-Arbestain, M., and Hedley, M.: Effect of biochar on soil physical properties  
491 in two contrasting soils: An Alfisol and an Andisol, 209–210, 188–197,  
492 <https://doi.org/10.1016/j.geoderma.2013.06.016>, 2013.*
- 493 • *Barnes, R. T., Gallagher, M. E., Masiello, C. A., Liu, Z., and Dugan, B.: Biochar-induced changes in soil  
494 hydraulic conductivity and dissolved nutrient fluxes constrained by laboratory experiments, 9,  
495 <https://doi.org/10.1371/journal.pone.0108340>, 2014.*

496

497 Response: We agree that application rate and particle size are important determinants of nutrient  
498 retention and hydraulic conductivity in biochar-amended soils, and will include these and other citations  
499 in a brief discussion of this. However, as described on page 4 of this document (in response to the  
500 comment about line 177), there is no current “representative” biochar amendment rates for particular  
501 uses or soil types. The chosen rate is representative of recommendations that exist in the literature (see  
502 page 4), and is the midrange from experiments of similar design (See tables in literature review from  
503 Blanco-Canqui, 2017). This study measured several responses ( $K_{sat}$  in two soils, nitrate and ammonium  
504 leaching (quantity and timing) in one soil, and nitrate and ammonium sorption, using 7 biochars in which  
505 we tested the effect of feedstock and production temperature). The effect of application rate was  
506 outside the purview of this study, given the extensive work already involved in the experimental design.  
507 Furthermore, we did not test the effect of particle size by creating biochars of different sizes, because  
508 we sought to use commercially available materials so that experiments could be repeated. This is, in  
509 part, in response to a literature review which critiqued biochar studies which use only small-batch lab-  
510 created biochars (Zhang et al., 2016). Nevertheless, we included a discussion of particle size in lines 353-  
511 359 when describing hydraulic conductivity. As stated previously, we will lengthen the discussion around  
512 these topics by moving citations from the introduction and by making the link between our results and  
513 current literature more explicit.

514

515• **Line 353-354: What was the relative particle size distribution. These characteristics are not presented.**

516

517 Response: Mean and median particle sizes for all biochars are provided in Table 1.

518

519• **Line 354-355: How can the authors provide prove of this statement?**

520

521 This statement is a hypothesis backed by evidence from the literature, but cannot be proved within the  
522 context of our study. As stated, this statement could be further explored and supported through future  
523 research: “Additional research and quantitative analysis at the micron and sub-micron scale is required  
524 to assess the influence of biochar on soil porosity and pore architecture.”  
525

526● **Line 374-376: This has not been discussed so far. But the field applications of this experiment need to**  
527 **be included in the critical discussion. The intention of this study was, according to the title, to consider**  
528 **agricultural soils. Furthermore, how can the authors draw a conclusion for flooded agricultural**  
529 **systems when they did not include soils from such systems?**  
530

531 Response: As described on line 435 of this document (in response to section 4.3), we will add another  
532 section to the discussion entitled “4.4 Implications for field conditions”.  
533

### 534 **Summary**

535 We again thank the reviewer for these detailed and helpful comments, which we believe will strengthen  
536 the manuscript, broaden its impact, and increase interest from readers of SOIL. To address the  
537 reviewer’s primary concerns, we have restructured the discussion which was previously split between  
538 the introduction and discussion sections, clarified many details of the materials and methods, and better  
539 linked these experiments to production-scale agriculture.  
540

541 Though the reviewer critiqued the lack of discussion and mechanistic investigation, we believe the error  
542 is not in a *lack* but in a *non-ideal placement*. We have moved the already cited sources and descriptions  
543 from the introduction, and better connected them to our own results in the discussion section. As the  
544 reviewer described, the current structure of the manuscript is not as strong as it could be. We have  
545 rearranged according to the reviewer’s suggestions as described extensively above. Furthermore, we  
546 added data from our additional experiment on PZC, literature sources the reviewer provided as well as  
547 others not provided, and better connected these results to our ongoing and critical field trials. While we  
548 appreciate the reviewer’s suggestions, we respectfully do not believe the comments provided are  
549 grounds for rejection, as there are no issues with experimental design, results, or importance of the  
550 work pursued. We believe we can swiftly implement the provided suggestions for a better structured  
551 and more transparent manuscript, that will be of great impact.  
552  
553  
554  
555  
556  
557  
558  
559  
560  
561  
562  
563  
564  
565  
566  
567  
568

569 **References**

- 570 ASTM D 1762-84: Standard Test Method for Chemical Analysis of Wood Charcoal., ASTM Int.,  
571 84(Reapproved 2007), 1–2, doi:10.1520/D1762-84R07.2, 2011.
- 572 Blanco-Canqui, H.: Biochar and Soil Physical Properties, *Soil Sci. Soc. Am. J.*, 81(4), 687–711,  
573 doi:10.2136/sssaj2017.01.0017, 2017.
- 574 Chandra, S., Medha, I. and Bhattacharya, J.: Potassium-iron rice straw biochar composite for sorption of  
575 nitrate, phosphate, and ammonium ions in soil for timely and controlled release, *Sci. Total Environ.*, 712,  
576 136337, doi:10.1016/j.scitotenv.2019.136337, 2020.
- 577 Clough, T. J. and Condon, L. M.: Biochar and the Nitrogen Cycle: Introduction, *J. Environ. Qual.*, 39(4),  
578 1218, doi:10.2134/jeq2010.0204, 2010.
- 579 Gai, X., Wang, H., Liu, J., Zhai, L., Liu, S., Ren, T. and Liu, H.: Effects of feedstock and pyrolysis  
580 temperature on biochar adsorption of ammonium and nitrate, *PLoS One*, 9(12), 1–19,  
581 doi:10.1371/journal.pone.0113888, 2014.
- 582 Gao, F., Xue, Y., Deng, P., Cheng, X. and Yang, K.: Removal of aqueous ammonium by biochars derived  
583 from agricultural residuals at different pyrolysis temperatures, *Chem. Speciat. Bioavail.*, 27(2), 92–97,  
584 doi:10.1080/09542299.2015.1087162, 2015.
- 585 Guo, M.: The 3R Principles for Applying Biochar to Improve Soil Health, *Soil Syst.*, 4(1), 9,  
586 doi:10.3390/soilsystems4010009, 2020.
- 587 Hassan, M., Liu, Y., Naidu, R., Parikh, S. J., Du, J., Qi, F. and Willett, I. R.: Influences of feedstock sources  
588 and pyrolysis temperature on the properties of biochar and functionality as adsorbents: A meta-analysis,  
589 *Sci. Total Environ.*, 744, 140714, doi:10.1016/j.scitotenv.2020.140714, 2020.
- 590 International Organization for Standardization (ISO): Determination of the specific surface area of solids  
591 by gas adsorption - BET method (ISO 9277:2010(E)), Ref. number ISO, doi:10.1007/s11367-011-0297-3,  
592 2010.
- 593 Jeffery, S., Verheijen, F. G. A., van der Velde, M. and Bastos, A. C.: A quantitative review of the effects of  
594 biochar application to soils on crop productivity using meta-analysis, *Agric. Ecosyst. Environ.*, 144(1),  
595 175–187, doi:10.1016/j.agee.2011.08.015, 2011.
- 596 Jones, D. L., Rousk, J., Edwards-Jones, G., DeLuca, T. H. and Murphy, D. V.: Biochar-mediated changes in  
597 soil quality and plant growth in a three year field trial, *Soil Biol. Biochem.*, 45, 113–124,  
598 doi:10.1016/j.soilbio.2011.10.012, 2012.
- 599 Kerré, B., Willaert, B., Cornelis, Y. and Smolders, E.: Long-term presence of charcoal increases maize  
600 yield in Belgium due to increased soil water availability, *Eur. J. Agron.*, 91(September), 10–15,  
601 doi:10.1016/j.eja.2017.09.003, 2017.
- 602 Lenth, R.: Emmeans: estimated marginal means, Aka Least-Squares Means., [https://cran.r-](https://cran.r-project.org/package=emmeans)  
603 [project.org/package=emmeans](https://cran.r-project.org/package=emmeans), doi:<https://CRAN.R-project.org/package=emmeans>, 2019.
- 604 Madari, B. E., Silva, M. A. S., Carvalho, M. T. M., Maia, A. H. N., Petter, F. A., Santos, J. L. S., Tsai, S. M.,  
605 Leal, W. G. O. and Zeviani, W. M.: Properties of a sandy clay loam Haplic Ferralsol and soybean grain  
606 yield in a five-year field trial as affected by biochar amendment, *Geoderma*, 305(June 2016), 100–112,  
607 doi:10.1016/j.geoderma.2017.05.029, 2017.
- 608 McDonald, M. R., Bakker, C. and Motior, M. R.: Evaluation of wood biochar and compost soil  
609 amendment on cabbage yield and quality, *Can. J. Plant Sci.*, 99(5), 624–638, doi:10.1139/cjps-2018-  
610 0122, 2019.

611 Minami, K.: The effect of nitrogen fertilizer use and other practices on methane emission from flooded  
612 rice, *Fertil. Res.*, 40(1), 71–84, doi:10.1007/BF00749864, 1995.

613 Nawaz, H., Hussain, N., ... M. A.-I. and 2019, U.: Biochar Application Improves the Wheat Productivity  
614 under Different Irrigation Water-Regimes, *Intl. J. Agric. Biol.*, 21(April), 936–942,  
615 doi:10.17957/IJAB/15.0978, 2019.

616 Nelissen, V., Ruyschaert, G., Manka'Abusi, D., D'Hose, T., De Beuf, K., Al-Barri, B., Cornelis, W. and  
617 Boeckx, P.: Impact of a woody biochar on properties of a sandy loam soil and spring barley during a two-  
618 year field experiment, *Eur. J. Agron.*, 62, 65–78, doi:10.1016/j.eja.2014.09.006, 2015.

619 Oladele, S. O.: Changes in physicochemical properties and quality index of an Alfisol after three years of  
620 rice husk biochar amendment in rainfed rice – Maize cropping sequence, *Geoderma*, 353(June), 359–  
621 371, doi:10.1016/j.geoderma.2019.06.038, 2019.

622 Pandit, N. R., Mulder, J., Hale, S. E., Zimmerman, A. R., Pandit, B. H. and Cornelissen, G.: Multi-year  
623 double cropping biochar field trials in Nepal: Finding the optimal biochar dose through agronomic trials  
624 and cost-benefit analysis, *Sci. Total Environ.*, 637–638, 1333–1341, doi:10.1016/j.scitotenv.2018.05.107,  
625 2018.

626 Parikh, S. J., Goyne, K. W., Margenot, A. J., Mukome, F. N. D. and Calderón, F. J.: Soil chemical insights  
627 provided through vibrational spectroscopy., 2014.

628 Peiris, C., Gunatilake, S. R., Wewalwela, J. J. and Vithanage, M.: Biochar for sustainable agriculture:  
629 Nutrient dynamics, soil enzymes, and crop growth, Elsevier Inc., 2018.

630 R Core Team: R: A language and environment for statistical computing, [online] Available from:  
631 <https://www.r-project.org/>, 2020.

632 Razzaghi, F., Obour, P. B. and Arthur, E.: Does biochar improve soil water retention? A systematic review  
633 and meta-analysis, *Geoderma*, 361(September), 114055, doi:10.1016/j.geoderma.2019.114055, 2020.

634 Soil Survey Staff: Web Soil Survey, Natural Resources Conservation Service, United States Department of  
635 Agriculture, Nat. Resour. Conserv. Serv. United States Dep. Agric., 1–2 [online] Available from:  
636 <http://websoilsurvey.nrcs.usda.gov/> (Accessed 1 January 2021), 2014.

637 Wang, B., Lehmann, J., Hanley, K., Hestrin, R. and Enders, A.: Adsorption and desorption of ammonium  
638 by maple wood biochar as a function of oxidation and pH, *Chemosphere*, 138, 120–126,  
639 doi:10.1016/j.chemosphere.2015.05.062, 2015.

640 Wickham, H.: ggplot2: Elegant Graphics for Data Analysis, Springer-Verlag New York [online] Available  
641 from: <https://ggplot2.tidyverse.org>, 2016.

642 Wickham, H., Averick, M., Bryan, J., Chang, W., McGowan, L., François, R., Golemund, G., Hayes, A.,  
643 Henry, L., Hester, J., Kuhn, M., Pedersen, T., Miller, E., Bache, S., Müller, K., Ooms, J., Robinson, D.,  
644 Seidel, D., Spinu, V., Takahashi, K., Vaughan, D., Wilke, C., Woo, K. and Yutani, H.: Welcome to the  
645 Tidyverse, *J. Open Source Softw.*, 4(43), 1686, doi:10.21105/joss.01686, 2019.

646 Yang, H. I., Lou, K., Rajapaksha, A. U., Ok, Y. S., Anyia, A. O. and Chang, S. X.: Adsorption of ammonium in  
647 aqueous solutions by pine sawdust and wheat straw biochars, *Environ. Sci. Pollut. Res.*, 25(26), 25638–  
648 25647, doi:10.1007/s11356-017-8551-2, 2017.

649 Yao, Y., Gao, B., Zhang, M., Inyang, M. and Zimmerman, A. R.: Effect of biochar amendment on sorption  
650 and leaching of nitrate, ammonium, and phosphate in a sandy soil, *Chemosphere*, 89(11), 1467–1471,  
651 doi:10.1016/j.chemosphere.2012.06.002, 2012.

652 Yin, Q., Zhang, B., Wang, R. and Zhao, Z.: Phosphate and ammonium adsorption of sesame straw

653 biochars produced at different pyrolysis temperatures, *Environ. Sci. Pollut. Res.*, 25(5), 4320–4329,  
654 doi:10.1007/s11356-017-0778-4, 2018.

655 Zeng, Z., Zhang, S., Li, T., Zhao, F., He, Z., Zhao, H., Yang, X., Wang, H., Zhao, J. and Rafiq, M. T.: Sorption  
656 of ammonium and phosphate from aqueous solution by biochar derived from phytoremediation plants,  
657 *J. ZHEJIANG Univ. B*, 14(12), 1152–1161, doi:10.1631/jzus.B1300102, 2013.

658 Zhang, D., Yan, M., Niu, Y., Liu, X., van Zwieten, L., Chen, D., Bian, R., Cheng, K., Li, L., Joseph, S., Zheng,  
659 J., Zhang, X., Zheng, J., Crowley, D., Filley, T. R. and Pan, G.: Is current biochar research addressing global  
660 soil constraints for sustainable agriculture?, *Agric. Ecosyst. Environ.*, 226, 25–32,  
661 doi:10.1016/j.agee.2016.04.010, 2016.

662 Zhang, M., Song, G., Gelardi, D. L., Huang, L., Khan, E., Parikh, S. J., Ok, Y. S., Song, G., Gelardi, D. L.,  
663 Huang, L., Khan, E., Parikh, S. J. and Ok, Y. S.: Evaluating biochar and its modifications for the removal of  
664 ammonium, nitrate, and phosphate in water, *Water Res.*, Preprint, doi:10.1016/j.watres.2020.116303,  
665 2020.

666 Zheng, H., Wang, Z., Deng, X., Zhao, J., Luo, Y., Novak, J., Herbert, S. and Xing, B.: Characteristics and  
667 nutrient values of biochars produced from giant reed at different temperatures, *Bioresour. Technol.*,  
668 130, 463–471, doi:10.1016/j.biortech.2012.12.044, 2013.

669
