# Supplementary material for: Biochar alters hydraulic conductivity and inhibits nutrient leaching in two agricultural soils
Source: Copernicus journal article supplement (doi:10.5194/soil-2021-45), 2021-05-27
Supplement: Supplementary file [file soil-2021-45-AC2-supplement.pdf]

1 **Reviewer #2**

2  
3 Response: We thank the reviewer for their thoughtful and in-depth analysis of our manuscript, and  
4 appreciate the time and effort that went into this review. We have addressed the reviewer's comments  
5 by restructuring the manuscript to shorten the introduction and lengthen the discussion. Those changes  
6 make our knowledge of the literature more explicit, and better situate our specific results within the  
7 ongoing work in this field. We have also made significant edits to the materials and methods section  
8 which clarify many details that were previously opaque. Finally, we have performed an additional  
9 experiment at the reviewer's suggestion, to include point of zero charge (PZC) data for the biochars  
10 included in the column studies. As there was overlap in the suggestions from each reviewer, some of our  
11 responses can also be found in the document submitted in response to reviewer #1. Details of our edits  
12 are included below.

13 **Application of biochar to bind nutrients in soil and alter hydraulic properties of the soil is an**  
14 **important and relevant topic for large scale application of biochar in agricultural fields. The authors of**  
15 **this current paper have tried to add more insights into the existing literature in this context. Overall,**  
16 **after a first glance through, the reader can follow the main message of the paper. However, I have a**  
17 **few main points of concern regarding the manuscript:**

- 18 • **The title of the paper states “inhibits nutrient leaching” – the data for nitrate does not**  
19 **necessarily show this.**

20 Response: We agree that ammonium is retained to a much larger extent, and has greater  
21 potential for leaching mitigation in biochar-amended soils. However, nitrate leaching was also  
22 inhibited, though to a lesser and more transient extent. While this result is minor in magnitude, it  
23 may have great significance for fertilizer use efficiency in cropping systems, especially where  
24 biochars can be engineered to have high surface area and low CEC, as described in this study. To  
25 address the reviewer's concerns, and more accurately depict the work contained within this  
26 manuscript, we have changed the title to “Biochar alters hydraulic conductivity and **impacts**  
27 nutrient retention in two agricultural soils.”

- 28 • **There lacks a sense of novelty in the experimental approach of the manuscript. Experimental**  
29 **details are missing especially for the column studies.**

30 Response: Details have been extensively updated, as described below in response to reviewer's  
31 specific comments. Regarding the novelty of this work, we agree that we have not made this  
32 clear enough in the original manuscript. In the next iteration, we have explicitly stated that this  
33 study is novel for the following reasons:

- 34 1) It includes a robust experimental matrix with 7 commercially available biochars  
35 included in the sorption experiments (and, based on those results, 3 biochars in 2 soils  
36 for  $K_{sat}$  data, and then 3 biochars in a sandy soil for leaching data, where results are  
37 most important given the potential for sandy soils to leach N). As stated many times  
38 throughout the literature, the use of commercially available materials (as opposed to  
39 laboratory-produced biochar) is essential for replicability of results, and for the potential  
40 for these materials to be used in real world cropping systems;  
41 2) The experimental approach allows for chemical and physical retention mechanisms  
42 to be distinguished: Even where biochar displayed no chemical affinity for nitrate,

43 nitrate was retained in leaching studies, where it was linked to high surface area and  
44 low CEC. This suggests a physical entrapment, as elucidated in-text with appropriate  
45 citations. While many studies investigate nitrate/ammonium chemisorption or leaching,  
46 rarely are both explored given the extensive labor involved in experimental setup and  
47 maintenance. Data from our study will be critical for biochar producers to design  
48 materials that improve soil water or nutrient retention dynamics, or for land managers  
49 to predict how biochars may behave in specific agricultural conditions.

50 3) This study utilizes the same biochars and soils as those in 3-year field trials. Results  
51 from these lab scale experiments can be used to interpret those obtained from field  
52 trials, and help provide both fine resolution mechanistic investigation, and effects from  
53 real-world agricultural systems.

54  
55 **A more mechanistic insight would have been interesting. Key factors which would have been**  
56 **critical for achieving this and making a more impactful statement are (i) measurement of point**  
57 **of zero charge (for supporting any statements using electrostatic repulsion or attraction) (ii)**  
58 **measurements of anions and cations released during column nutrient leaching tests (iii) use of**  
59 **non-reactive tracers such as “deuterated water” could have been an interesting approach to**  
60 **understand movement of water through columns, etc.**

- 61
- 62 • **The term “physical and chemical interactions/affinity” is used very lightly and often in the**  
63 **manuscript without providing concrete proof for these interactions.**
  - 64 • **An in-depth literature study in the discussion would have provided readers with more**  
65 **confidence in the conclusions that the authors wished to make.**
  - 66 • **The entire sense of “timing of release of nitrate” and its importance needs to have been**  
67 **brought to light. Is it sufficient for nitrate to be captured physically for a short duration and**  
68 **then released?**
  - 69 • **The entire discussion in Section 4.3 is underwhelming.**

70 Response: At the reviewer’s suggestion we have included PZC measurements, and extended the  
71 discussion of likely and potential mechanisms by including a more extensive literature review in  
72 the discussion, which was previously confined to the introduction. We thank the reviewer for  
73 their comments, as they have led to a better structured manuscript which will be of greater  
74 impact and interest to readers of SOIL. We have addressed the remaining issues in detail in  
75 response to specific comments below.

76  
77 **Abstract and Introduction**

- 78
- 79 • **Line 47-48 – this is not always true. There are some biochars which have a PZC of 7.5 or higher**  
80 **and then they might be positively charged.**

81 Response: We agree that biochars are not always negatively charged, and have changed the  
82 statement to include more extensive discussion and citations, as below:

83  
84 “Biochar surfaces range in their protonation state when added to the soil, as a function  
85 of soil pH and their point of zero charge (PZC). While PZCs between 7 and 10 have been  
86 observed (Lu et al., 2013; Uchimiya et al., 2011), the high number of oxygen-containing  
87 (primarily carboxyl) functional groups typically lead to PZCs between 1.5 and 5 (Peiris et

88 al., 2019; Uchimiya et al., 2011; Wang et al., 2020). Due to these PZCs, the  
89 deprotonation of biochar surface functional groups occurs, leading to a net negative  
90 charge within most agronomic soils (pH ~5-7.5).”

91 Furthermore, we conducted an additional experiment at the reviewer's suggestion to measure  
92 the point of zero charge (PZC) of the three biochars used in our column studies. We have  
93 included this data, as well as the appropriate methods description and citation of sources.  
94 Briefly, we found that the PZC was 6.8 for AS800, 3.2 for AS500, and 3.9 for SW500. As most  
95 agricultural soils have a pH well above 4, including those tested in our study, AS500 and SW500  
96 would be expected to be negatively charged. The higher PZC of AS800 was to be expected, as it  
97 has a higher ash content, and higher metal-oxide content as demonstrated through IR peaks at  
98 ~1000 to 700 cm<sup>-1</sup>, consistent with metal oxide vibrations (Parikh et al., 2014). This PZC is lower  
99 than the pH of the soil it was added to, and was likely negatively charged.

- 100 • **Line 85 – Suggestion is to introduce what is saturated hydraulic conductivity out here itself.**

101 Response: The line currently reads: “biochar has largely been shown to decrease the ability of a  
102 saturated soil to transmit water (saturated hydraulic conductivity ( $K_{sat}$ )).” This statement both  
103 introduces the definition of hydraulic conductivity and the abbreviation it is referred to  
104 throughout the rest of the manuscript. If the reviewer is suggesting something different, it is  
105 unfortunately not clear to us.

- 106 • **Line 91 – how is the biochar “physically altering the soil to influence  $K_{sat}$ ?”**

107 Response: Lines 80-89 directly prior to this statement provide a detailed discussion of how  
108 biochar can physically alter soil structure through decreased bulk density, increased porosity,  
109 and changes in mean pore size, and therefore influence water movement through the soil  
110 (below). However, to make our meaning more clear, we will delete the word “physically” from  
111 the sentence on line 91.

112 “In addition to chemical and microbial mechanisms, biochar may retain N through  
113 physical means (Clough and Condron, 2010). One study determined that biochar  
114 decreased soil bulk density by 3 to 31%, and increased porosity by 14 to 64% (Blanco-  
115 Canqui, 2017). Biochar can also alter mean pore size and pore architecture, thereby  
116 influencing tortuosity and the residence time of water and nutrients within the soil  
117 profile (Lim et al., 2016; Quin et al., 2014). The impact of biochar on hydraulic  
118 conductivity largely appears dependent on soil texture, which highly influences pore  
119 structure. While exceptions have been observed, biochar has largely been shown to  
120 decrease the ability of a saturated soil to transmit water (saturated hydraulic  
121 conductivity ( $K_{sat}$ )) in coarse textured soils and increase  $K_{sat}$  in finer soils (Blanco-Canqui,  
122 2017). The impact of biochar on these soil physical properties may influence nitrate  
123 retention through a mechanism known as “nitrate capture,” in which nitrate molecules  
124 become physically entrapped within biochar pores (Haider et al., 2016), potentially  
125 leading to increased residence time in crop rooting zones and a greater opportunity for  
126 plant uptake (Haider et al., 2020; Kameyama et al., 2012; Kammann et al., 2015).”

127 **Materials and methods**

- 128
- **Line 105 – From which four commercial companies?**

129 Response: This information has now been included, as follows:

130

131 “Seven biochars were obtained from the following feedstocks and produced at the  
132 following temperatures: almond shell at 500 °C (AS500, produced by Karr Group Co.),  
133 almond shell and 800 °C (AS800, Premier Mushroom and Community Power Co),  
134 coconut shell at 650 °C (CS650, Cool Planet), softwood at 500 °C (SW500, Karr Group  
135 Co.), softwood at 650 °C (SW650, Cool Planet), and softwood at 800 °C (SW800, Pacific  
136 Biochar), and an additional softwood biochar produced at 500 °C and inoculated with a  
137 proprietary microbial formula (SW500-I, Karr Group Co.).”

- 138
- **Line 107 – What is the inoculated microbial formula?**

139 Response: As the biochars are commercially available, many of the production details—including  
140 the microbial formula—are proprietary and were not disclosed. However, now that we have  
141 included the company names at the reviewers suggestion, other scientists can repeat  
142 experiments with these biochars, working with the producers if desired.

- 143
- **Line 137 – Do not see the need to specify ongoing field trials if there is no connection with the  
144 current paper.**

145 Response: The connection between these experiments and ongoing field trials is critical to the  
146 novelty and importance of this study, as we are using the same soils and biochars to investigate  
147 agronomically relevant responses at multiple scales. However, we agree that the connection  
148 was not made clear enough, as description of the field trials is currently contained only in the  
149 methods section 2.2. In the next iteration of this manuscript, we have included an additional  
150 final paragraph in the discussion section, as detailed below:

151

152 “4.4 Implications for field conditions

153

154 It is difficult to extrapolate results from these laboratory-scale investigations to field-  
155 scale, production agriculture, as real-world conditions will have additional variables in  
156 climate, soil-water, and soil-plant dynamics. However, the results of this study suggest  
157 these biochars may increase the residence time of water in sandy soils and increase  
158 drainage in fine textured soils during irrigation or flooding events, or when soils are  
159 otherwise saturated. Results may be particularly relevant for flooded agricultural  
160 systems such as rice, where ammonium is the primary source of N and water retention  
161 is a key parameter for success (Minami, 1995). Indeed, 95% of California rice production  
162 occurs in the Sacramento Valley, where both the YSiL and HSL soils are common  
163 ([http://rice.ucanr.edu/About\\_California\\_Rice/](http://rice.ucanr.edu/About_California_Rice/)). Data from these trials may help growers  
164 in these regions and soil textures determine if biochar can increase water and nutrient  
165 retention in their systems.

166

167 Recent meta-analyses have concluded that biochar substantially increased soil water  
168 content at field capacity and permanent wilting point, in the field and lab, in coarse  
169 textured soils only (Blanco-Canqui, 2017; Razzaghi et al., 2020). Despite these observed

170 trends, benefits have also been observed in fine textured soils, including reduced crop  
171 water stress, increased yield (Kerré et al., 2017; Nawaz et al., 2019), and reduced crop  
172 loss during deficit irrigation (Madari et al., 2017). Other authors have reported little to  
173 no effect, or transient effects, of biochar on soil water dynamics in both fine and coarse  
174 textured soils (Jones et al., 2012; McDonald et al., 2019; Nelissen et al., 2015). However,  
175 results from our experiments can only be conservatively extrapolated to dryland  
176 agriculture or in soils that experience wet-dry cycles, as unsaturated hydraulic  
177 conductivity was not measured. In order to determine how these biochars may behave  
178 in unsaturated conditions, current three-year processing tomato field trials are currently  
179 underway in these same soil textures, in which soil-water dynamics are being  
180 measured.”

- 181 • **Line 156 – It makes more sense to present electrolyte concentrations on a mM or M basis, to**  
182 **normalize it. Why is this test done with NaCl and the column tests with CaCl<sub>2</sub>?**

183 Response: We have changed the concentrations to mM at the reviewer’s suggestion.  
184 Monovalent electrolyte solutions are commonly used in sorption studies to avoid cation bridging  
185 which would confound sorption results. However, Na is a known dispersing agent when added  
186 to soils, and so CaCl<sub>2</sub> was used in column tests rather than NaCl to prevent dispersal and the  
187 creation of preferential flow paths. We have added a statement about this in the materials and  
188 methods section to make this reasoning transparent.

- 189 • **Line 165 – Which are the “multiple equations”?**

190 Response: We have edited this statement to say “Langmuir, Freundlich, and Langmuir-  
191 Freundlich equations were tested to model the adsorption isotherms, with the Freundlich  
192 equation (Eq. (2)) demonstrating the best fit based on  $r^2$  values.”

- 193 • **Line 175 – How were the columns packed?**

194 A citation for the packing has been added to increase replicability:

195 “Columns were prepared using the dry packing method according to Gibert et al.  
196 (2014).”

- 197 • **Was the biochar homogeneously mixed with the soils?**

198 Response: Yes, soils and biochars were thoroughly and homogeneously mixed through a  
199 combination of stirring and shaking within a sealed container for a minimum of 120 seconds.  
200 The following sentence has been added:

201 “Soils and biochars were thoroughly and homogeneously mixed prior to being added to  
202 tempe cells.”  
203

- 204 • **How was existence of preferential flow ruled out? Any tracer?**  
205

206 We acknowledge that the use of a tracer would have been beneficial to our mechanistic  
207 interpretation of results, and thank the reviewer for this suggestion. Even without a tracer,  
208 however, there was no evidence of preferential flow in any of the five replicates for any of the  
209 treatments. Error bars were very small for both nutrient concentrations across pore volumes in  
210 the breakthrough curves, as well in the hydraulic conductivity measurements as measured by  
211 data loggers.

212  
213

- **What was the flow rate and the pore volume?**

214 Response: As stated on line 179, each column was gravity-fed a solution at a constant pressure  
215 head of 34 cm. The “flow rate” is therefore the  $K_{sat}$  itself, provided in the results section. Soil  
216 porosity was provided in Table 3. Additionally, we have now edited the methods section to  
217 provide core volume, as below in bold:

218 “To investigate the influence of biochar on saturated hydraulic conductivity ( $K_{sat}$ ),  
219 constant head column experiments were performed in five replicates using the 5 station  
220 Chameleon Kit (Soilmoisture Equipment Corporation (SEC) 2816GX). SEC tempe cells,  
221 **each with a volume of 136.4 cm<sup>3</sup>** were packed with soils amended with 0 and 2% (w/w)  
222 AS500, AS800, or SW500 biochars...”

223

- **Lines 175-184 – Why was  $k_{sat}$  measured for 2 soils, whereas sorption for only 1?**

224 Response: We agree that the study would have benefited from leaching data from both the YSiL  
225 and the HSL soils. However, column experiments were performed without the aid of  
226 autosamplers or mechanization of any kind. As shown in Figure 3, the  $K_{sat}$  for the unamended  
227 HSL soil columns was 1.2 cm s<sup>-1</sup>. To manually collect 20 pore volumes of leachate, 15 hours of  
228 active maintenance was required per treatment, for a total of 4 treatments. The YSiL  $K_{sat}$  was  
229 0.044 cm s<sup>-1</sup>, or a 96% reduction in flow rate from the HSL. It was not feasible for someone to  
230 stay in lab for the time required to collect 20 pore volumes at this speed. After attempting it for  
231 two treatments, we decided to proceed with the HSL data, as it was logistically possible and  
232 would provide more valuable information. To make this clear to readers, we will include the  
233 following statement (new content in bold):

234

235 “Columns were also used to investigate the nutrient retention and leaching in HSL  
236 amended with 0 and 2% biochar. Preliminary trials with the YSiL demonstrated that  
237 leaching rates were very low (~0.044 cm<sup>-1</sup>) creating logistical challenges for conducting  
238 these experiments. Additionally, the impact of nitrate leaching is much more  
239 pronounced in more coarsely textured soils and thus leaching experiments were  
240 conducted only in HSL columns”

241

## **Results**

- **Line 196 – increased pyrolysis temperature usually increases carbonization.**

242

243 We agree that increased temperature often results in higher carbon content; however, this is  
244 dependent on the feedstock and production parameters, especially atmospheric oxygen  
245 content. As these materials were obtained from commercial sources, we do not have specific  
246

247 information regarding oxygen levels. The higher ash content in the almond shell biochars was  
248 expected, due to the high cation content of almond shell feedstocks (Aktas et al., 2015) which  
249 are concentrated at higher temperatures. The impact of pyrolysis temperature on the ash  
250 content of softwood biochars is less pronounced.

- 251
- 252 • **Line 268 – what do you mean by “main effect”? p values correspondence not clear.**

253 Response: We have edited the statement as follows:

254

255 “There was a significant effect of biochar ( $p = 0.001$ ) and soil texture ( $p < 0.001$ ), as well  
256 as a significant interaction between biochar and soil texture ( $p = 0.006$ ), on saturated  
257 hydraulic conductivity.”

- 258
- 259 • **Figure 4- It is very hard to discern the data and the decrease in leaching of NO<sub>3</sub> from the  
260 control to HSL+SW500. Please consider to reduce the y axis from 100 mg/L to something  
261 smaller (4(a)) to make the graph better accessible (in regards to the data in the text) for the  
readers.**

262 Response: We agree that the data is difficult to read in the one instance the reviewer indicates,  
263 however, the y axis cannot be reduced, as the initial nitrate flush in pore volumes 0-10 neared  
264 100 mg L<sup>-1</sup>. As is, the figure shows the reader that a) HSL had very high but easily leached levels  
265 of nitrate, and b) there was not much difference in nitrate leaching in soils with or without  
266 biochar. This information is highly descriptive and necessary to the study. To provide a more  
267 detailed snapshot of the data the reviewer is interested in, figure 5 was included so that exact  
268 nitrate quantities could be obtained across pore volumes 15, 20, and 25. Together, these two  
269 figures provide both an overview and a more fine-grained resolution of nutrient leaching in  
270 these columns.

271 **Discussion: In general, the discussion is not sufficient, and needs better structuring, with more  
272 references.**

273 Response: Our manuscript includes an extensive literature review with many references. We do not  
274 believe we need *more* literature, but, as the reviewer stated, a *better structured* literature review  
275 would be beneficial. Currently, we have included a lengthy discussion in the introduction. We did  
276 not include these same references in the discussion so as to avoid repetition, but agree that this  
277 context is important for our specific results. In the revised version, we have moved some of the  
278 extensive discussion from the introduction into the discussion, and we have related all findings to  
279 our results, as described below

- 280
- 281 • **Line 324-329 –This explanation is a bit underwhelming. A more mechanistic approach to this  
282 would have been to also measure cations and anions in solution – if nitrate is bound to  
283 positively charged components in the ash, one should see some anions being released. PZC  
284 measurements would have been crucial in the experimental design, since a lot of the  
reasoning is based on “electrostatic repulsion”.**

285 Response: As described in line 68 of this document, we have now included PZC measurements  
286 which substantiate the discussion of electrostatic repulsion and affinity.

- 287       • **Line 340-342 – A tracer study using “deuterated water” or something similar would have been**  
288       **a more mechanistic way to explain the movement of water through biochar packed columns.**

289  
290       Response: We acknowledge that the use of a tracer would have improved our mechanistic  
291       interpretation of results, and thank the reviewer for this suggestion. In future work we will  
292       consider this approach.

293  
294       **References**

295  
296       Aktas, T., Thy, P., Williams, R. B., McCaffrey, Z., Khatami, R. and Jenkins, B. M.: Characterization of almond  
297       processing residues from the Central Valley of California for thermal conversion, *Fuel Process. Technol.*,  
298       140, 132–147, doi:10.1016/j.fuproc.2015.08.030, 2015.  
299       Blanco-Canqui, H.: Biochar and Soil Physical Properties, *Soil Sci. Soc. Am. J.*, 81(4), 687–711,  
300       doi:10.2136/sssaj2017.01.0017, 2017.  
301       Clough, T. J. and Condon, L. M.: Biochar and the Nitrogen Cycle: Introduction, *J. Environ. Qual.*, 39(4),  
302       1218, doi:10.2134/jeq2010.0204, 2010.  
303       Gibert, O., Hernández, M., Vilanova, E. and Cornellà, O.: Guidelining protocol for soil-column experiments  
304       assessing fate and transport of trace organics, *Demeau*, 3(D.12.3(a)), 54, 2014.  
305       Haider, G., Steffens, D., Müller, C. and Kammann, C. I.: Standard Extraction Methods May Underestimate  
306       Nitrate Stocks Captured by Field-Aged Biochar, *J. Environ. Qual.*, 45(4), 1196–1204,  
307       doi:10.2134/jeq2015.10.0529, 2016.  
308       Haider, G., Joseph, S., Steffens, D., Müller, C., Taherymoosavi, S., Mitchell, D. and Kammann, C. I.: Mineral  
309       nitrogen captured in field-aged biochar is plant-available, *Sci. Rep.*, 10(1), 1–12, doi:10.1038/s41598-020-  
310       70586-x, 2020.  
311       Jones, D. L., Rousk, J., Edwards-Jones, G., DeLuca, T. H. and Murphy, D. V.: Biochar-mediated changes in  
312       soil quality and plant growth in a three year field trial, *Soil Biol. Biochem.*, 45, 113–124,  
313       doi:10.1016/j.soilbio.2011.10.012, 2012.  
314       Kameyama, K., Miyamoto, T., Shiono, T. and Shinogi, Y.: Influence of Sugarcane Bagasse-derived Biochar  
315       Application on Nitrate Leaching in Calcaric Dark Red Soil, *J. Environ. Qual.*, 41(4), 1131–1137,  
316       doi:10.2134/jeq2010.0453, 2012.  
317       Kammann, C. I., Schmidt, H. P., Messerschmidt, N., Linsel, S., Steffens, D., Müller, C., Koyro, H. W., Conte,  
318       P. and Stephen, J.: Plant growth improvement mediated by nitrate capture in co-composted biochar, *Sci.*  
319       *Rep.*, 5, 1–13, doi:10.1038/srep11080, 2015.



320 Kerré, B., Willaert, B., Cornelis, Y. and Smolders, E.: Long-term presence of charcoal increases maize yield  
321 in Belgium due to increased soil water availability, *Eur. J. Agron.*, 91(September), 10–15,  
322 doi:10.1016/j.eja.2017.09.003, 2017.

323 Lim, T. J., Spokas, K. A., Feyereisen, G. and Novak, J. M.: Predicting the impact of biochar additions on soil  
324 hydraulic properties, *Chemosphere*, 142, 136–144, doi:10.1016/j.chemosphere.2015.06.069, 2016.

325 Lu, H., Zhang, W., Wang, S., Zhuang, L., Yang, Y. and Qiu, R.: Characterization of sewage sludge-derived  
326 biochars from different feedstocks and pyrolysis temperatures, *J. Anal. Appl. Pyrolysis*, 102, 137–143,  
327 doi:10.1016/j.jaap.2013.03.004, 2013.

328 Madari, B. E., Silva, M. A. S., Carvalho, M. T. M., Maia, A. H. N., Petter, F. A., Santos, J. L. S., Tsai, S. M.,  
329 Leal, W. G. O. and Zeviani, W. M.: Properties of a sandy clay loam Haplic Ferralsol and soybean grain yield  
330 in a five-year field trial as affected by biochar amendment, *Geoderma*, 305(June 2016), 100–112,  
331 doi:10.1016/j.geoderma.2017.05.029, 2017.

332 McDonald, M. R., Bakker, C. and Motior, M. R.: Evaluation of wood biochar and compost soil amendment  
333 on cabbage yield and quality, *Can. J. Plant Sci.*, 99(5), 624–638, doi:10.1139/cjps-2018-0122, 2019.

334 Minami, K.: The effect of nitrogen fertilizer use and other practices on methane emission from flooded  
335 rice, *Fertil. Res.*, 40(1), 71–84, doi:10.1007/BF00749864, 1995.

336 Nawaz, H., Hussain, N., ... M. A.-I. and 2019, U.: Biochar Application Improves the Wheat Productivity  
337 under Different Irrigation Water-Regimes, *Intl. J. Agric. Biol*, 21(April), 936–942,  
338 doi:10.17957/IJAB/15.0978, 2019.

339 Nelissen, V., Ruyschaert, G., Manka'Abusi, D., D'Hose, T., De Beuf, K., Al-Barri, B., Cornelis, W. and Boeckx,  
340 P.: Impact of a woody biochar on properties of a sandy loam soil and spring barley during a two-year field  
341 experiment, *Eur. J. Agron.*, 62, 65–78, doi:10.1016/j.eja.2014.09.006, 2015.

342 Parikh, S. J., Goyne, K. W., Margenot, A. J., Mukome, F. N. D. and Calderón, F. J.: Soil chemical insights  
343 provided through vibrational spectroscopy., 2014.

344 Peiris, C., Nayanathara, O., Navarathna, C. M., Jayawardhana, Y., Nawalage, S., Burk, G., Karunanayake, A.  
345 G., Madduri, S. B., Vithanage, M., Kaumal, M. N., Mlsna, T. E., Hassan, E. B., Abeysundara, S., Ferez, F. and  
346 Gunatilake, S. R.: The influence of three acid modifications on the physicochemical characteristics of tea-  
347 waste biochar pyrolyzed at different temperatures: A comparative study, *RSC Adv.*, 9(31), 17612–17622,  
348 doi:10.1039/c9ra02729g, 2019.

349 Quin, P. R., Cowie, A. L., Flavel, R. J., Keen, B. P., Macdonald, L. M., Morris, S. G., Singh, B. P., Young, I. M.  
350 and Van Zwieten, L.: Oil mallee biochar improves soil structural properties-A study with x-ray micro-CT,  
351 *Agric. Ecosyst. Environ.*, 191, 142–149, doi:10.1016/j.agee.2014.03.022, 2014.

352 Razzaghi, F., Obour, P. B. and Arthur, E.: Does biochar improve soil water retention? A systematic review  
353 and meta-analysis, *Geoderma*, 361(September), 114055, doi:10.1016/j.geoderma.2019.114055, 2020.

354 Uchimiya, M., Chang, S. C. and Klasson, K. T.: Screening biochars for heavy metal retention in soil: Role of  
355 oxygen functional groups, *J. Hazard. Mater.*, 190(1–3), 432–441, doi:10.1016/j.jhazmat.2011.03.063,  
356 2011.

357 Wang, S., Kwak, J.-H., Islam, M. S., Naeth, M. A., Gamal El-Din, M. and Chang, S. X.: Biochar surface  
358 complexation and Ni(II), Cu(II), and Cd(II) adsorption in aqueous solutions depend on feedstock type, *Sci.*  
359 *Total Environ.*, 712, 136538, doi:https://doi.org/10.1016/j.scitotenv.2020.136538, 2020.

360
